# Supplementary material
Source: PubMed Central journal article supplement (PMC2867876)
Supplement: 0908774107_pnas.200908774SI.pdf [file 0908774107_pnas.200908774SI.pdf]

# Supporting Information

Tsai et al. 10.1073/pnas.0908774107

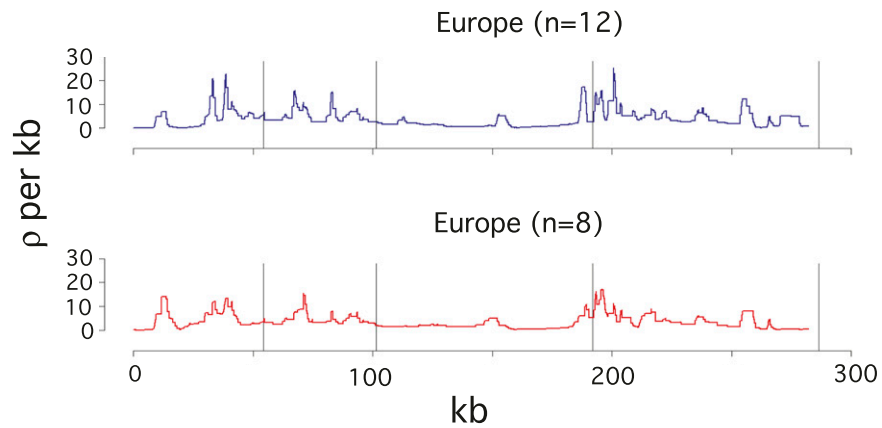

**Fig. S1.** The pattern of recombination along the chromosome is preserved, even when the sample size in Europe is reduced from 12 to only 8 strains, similar to the sample size in the Far East population.

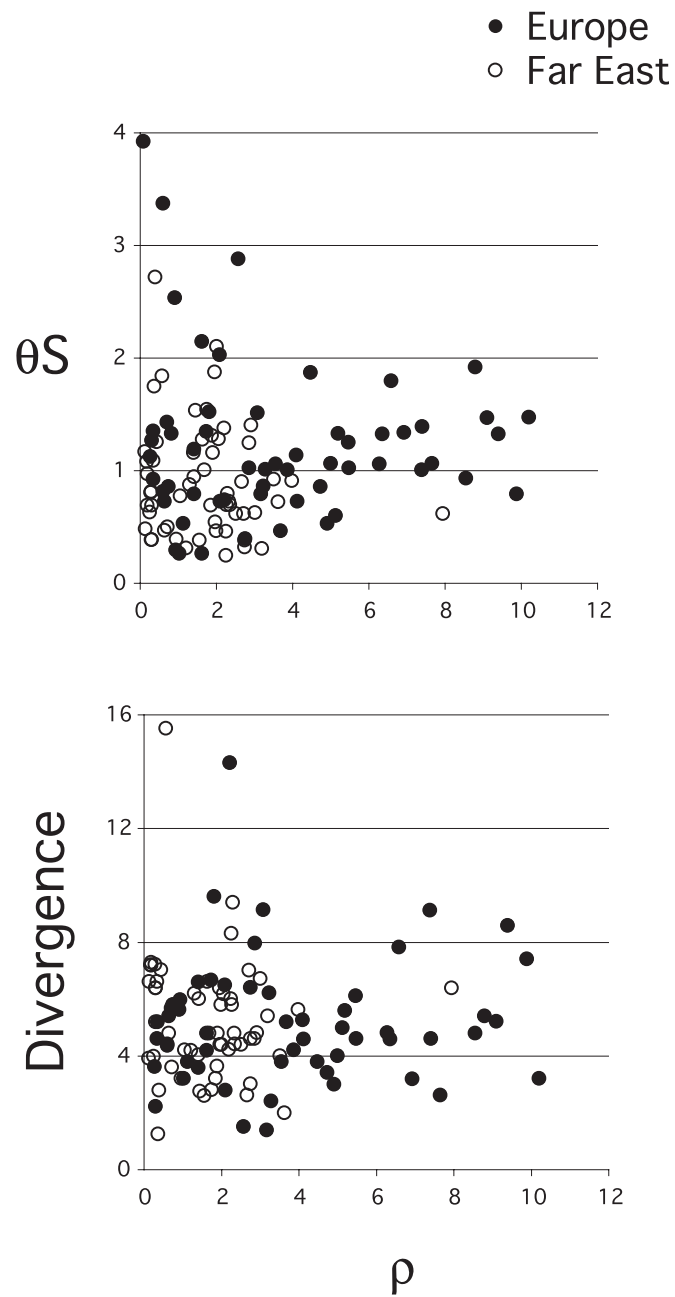

**Fig. S2.** Nucleotide diversity  $\theta_S$  and divergence from common ancestor plotted as a function of the population recombination parameter  $\rho$  (Morgans/kb) for Europe (closed) and Far East (open); points are values from nonoverlapping 5-kb windows (both correlations are nonsignificant; Kendall's  $\tau$ ,  $P > 0.40$ ).

**Table S1. Distribution of SNPs and haplotype blocks in chromosome III of *Saccharomyces paradoxus***

|          | <i>n</i>       | No. sites* | No. SNPs <sup>†</sup> | No. blocks | Block length (kb; SE, max) | No. SNPs per block (SE) |
|----------|----------------|------------|-----------------------|------------|----------------------------|-------------------------|
| Europe   | 12             | 230,106    | 464                   | 110        | 2.2 (0.2, 9.6)             | 5.4 (0.4)               |
|          | 8 <sup>‡</sup> | 242,501    | 377                   | 89         | 2.6 (0.3, 11.2)            | 5.9 (0.6)               |
| Far East | 8              | 213,559    | 232                   | 47         | 6.3 (0.9, 21.8)            | 6.6 (0.7)               |

Total length of the alignment is 286,935 bp; *n* is for number of chromosome sequences analyzed.

\*Only sites with no missing data in any of the strains are analyzed.

<sup>†</sup>Nonsingleton SNPs only.

<sup>‡</sup>Eight sequences chosen at random from the European population.

**Table S2. Summary statistics for genes and intergenes along chromosome III of *Saccharomyces paradoxus***

|                        | <i>n</i> | Europe $\rho$ (Morgans/kb) (SE) | <i>n</i> | Far East $\rho$ (Morgans/kb) (SE) |
|------------------------|----------|---------------------------------|----------|-----------------------------------|
| Genes                  | 140      | 3.9 (0.28)                      | 141      | 2.0 (0.14)                        |
| Intergenes             | 141      | 4.0 (0.33)                      | 141      | 1.9 (0.14)                        |
| 5' in at least one end | 105      | 4.5 (0.42)                      | 105      | 2.0 (0.17)                        |
| 5' - 5'                | 35       | 4.2 (0.71)                      | 36       | 1.9 (0.25)                        |
| 5'-3' and 3'-5'        | 69       | 4.6 (0.52)                      | 69       | 2.1 (0.22)                        |
| 3'-3'                  | 36       | 2.7 (0.40)                      | 36       | 1.6 (0.18)                        |

**Table S3. Measures of autocorrelation for 56 nonoverlapping 5-kb windows along chromosome III of *S. paradoxus***

|                               | Europe   |                | Far East |                |
|-------------------------------|----------|----------------|----------|----------------|
|                               | <i>r</i> | <i>P</i> value | <i>r</i> | <i>P</i> value |
| Recombination rate ( $\rho$ ) | 0.48     | 0.0003         | 0.51     | 0.0001         |
| GC content                    | 0.23     | 0.08           | 0.25     | 0.06           |
| $\theta_s$                    | 0.06     | 0.63           | -0.007   | 0.96           |
| $\theta_\pi$                  | 0.07     | 0.59           | 0.02     | 0.87           |
| Divergence                    | -0.007   | 0.96           | 0.10     | 0.47           |
